## 27 **Abstract**

28 CO<sub>2</sub>, temperature, water availability and light intensity were potential selective pressures  
29 to propel the initial evolution and global expansion of C<sub>4</sub> photosynthesis in grasses. To  
30 tease apart the primary selective pressures along the evolutionary trajectory, we coupled  
31 photosynthesis and hydraulics models and optimized photosynthesis over stomatal  
32 resistance and leaf/fine-root allocation. We also examined the importance of nitrogen  
33 reallocation from the dark to the light reactions. Our results show that the higher stomatal  
34 resistance and leaf/root allocation ratio conferred by the C<sub>4</sub> photosynthesis led to C<sub>4</sub>  
35 advantage without any change in hydraulic conductance. For the initial evolution of C<sub>4</sub>  
36 25-32 MYA, water limitation was the primary driver, and N reallocation was necessary.  
37 Low CO<sub>2</sub>, together with light intensity, were the primary drivers during the global  
38 radiation of C<sub>4</sub> 5-10 MYA, during this period N reallocation would not have been strongly  
39 selected.

40

## 41 **Introduction**

42 Understanding the evolution of C<sub>4</sub> photosynthesis and the global distribution of C<sub>3</sub> and C<sub>4</sub>  
43 grasses are central questions in macro-level plant evolution and ecology. Costs and  
44 benefits of the carbon concentrating mechanism (CCM) of C<sub>4</sub> grasses in different  
45 climates are key to deal with these questions. Physiological models of photosynthesis  
46 focused on examining temperature and CO<sub>2</sub> concentration as selective pressures for C<sub>4</sub>  
47 evolution and expansion (Ehleringer & Monson 1993, Ehleringer et al. 1997, Collatz et al.

48 1998). They demonstrate that under warmer temperatures and low CO<sub>2</sub> concentration,  
49 the CCM leads to less photorespiration and hence greater carbon gain in C<sub>4</sub>, but in  
50 cooler and high CO<sub>2</sub>, the metabolic costs of the CCM and lower photorespiration leads to  
51 greater carbon gain in C<sub>3</sub>. In evolutionary terms, it is thought that as grasslands  
52 expanded through the late Oligocene and early Miocene (Osborne 2008, Strömberg  
53 2011), the concomitant drop in CO<sub>2</sub> concentration and subsequent carbon starvation  
54 leading to an increase in photorespiration and the impetus for C<sub>4</sub> evolution in the  
55 grasses. A further drop in CO<sub>2</sub> concentration in the late Miocene was hypothesized to  
56 have led to the global-scale radiation of C<sub>4</sub> 5-10 MYA (Edwards et al. 2010, Sage et al.  
57 2012).

58  
59 Recent phylogenetic evidence has, however, challenged the traditional thinking about  
60 the controls on current distribution and the evolutionary impetus for C<sub>4</sub> in the grasses.  
61 Notably, the PACMAD clade, which contains all C<sub>4</sub> grasses, is distributed in warm areas  
62 regardless of photosynthetic pathway, whereas the BEP clade containing no C<sub>4</sub> grasses  
63 predominates in cold areas (Edwards & Still 2008). Thus, the current global distribution  
64 of C<sub>3</sub> and C<sub>4</sub> grasses might be a consequence of traits inherited from separate  
65 evolutionary lineages, as opposed to differential temperature responses between C<sub>3</sub> and  
66 C<sub>4</sub> photosynthesis. Additionally, water availability has emerged as a potential primary  
67 selective agent in the evolution of C<sub>4</sub> (Edwards & Still 2008, Edwards & Smith 2010), and  
68 a major contributor to current distribution of C<sub>3</sub> and C<sub>4</sub> species within a clade (Pau et al.

69 2013).  $C_4$  photosynthesis is thought to have a higher water-use-efficiency (WUE) than  $C_3$   
70 because the CCM allows for  $C_4$  to maintain a lower stomatal conductance for a given  
71 assimilation rate (Ghannoum 2009, Taylor et al. 2014). Enhanced WUE has long been  
72 suspected as the impetus for the evolution of  $C_4$  in dicotyledonous plants (Sage 2004,  
73 Edwards & Smith 2010). The potential role of water limitation in  $C_4$  grass evolution has  
74 sparked increased interest in explaining both current distributions and the anatomical  
75 shifts in  $C_3$  grasses that were prerequisites to  $C_4$  evolution (Griffiths et al. 2012, Osborne  
76 & Sack 2012, Taylor et al. 2012).

77

78 It is also likely that different selection pressures contributed to the initial evolution and  
79 subsequent spread of  $C_4$  photosynthesis. Estimates of  $CO_2$  concentrations during the  
80 initial period of  $C_4$  evolution in the grasses 25-32 MYA, range between 350-550 ppm  
81 (Cerling et al. 1997, Kürschner et al. 2008, Edwards et al. 2010, Sage et al. 2012). At the  
82 low end of this range, there would likely be selection for the evolution of  $C_4$  via the  
83 carbon-starvation hypothesis, but not at the high end. On the other hand, there is a  
84 general consensus that low  $CO_2$  led to the expansion of  $C_4$  grasses from 5-10 MYA, but  
85 recent phylogenetically-based analyses show that other factors, especially water  
86 availability, may play more important roles in the radiation of  $C_4$  grasses and expansion  
87 of  $C_4$  grassland (Edwards & Smith 2010, Osborne & Freckleton 2009, Griffiths et al.  
88 2012, Osborne & Sack 2012).

89

90 A related but largely unstudied evolutionary change during the divergence of  $C_4$   
91 photosynthesis from  $C_3$  is the allocation of nutrients between the dark reactions and the  
92 light reactions.  $C_4$  plants might allocate a greater proportion of N to light reactions than to  
93 dark reactions as compared to  $C_3$  because of the extra ATP costs of the CCM (Tissue et  
94 al. 1995, Ghannoum et al 2010). We propose that the reallocation of N between dark and  
95 light reactions provides a further advantage for  $C_4$  above the CCM alone, and that  
96 different environmental conditions can select for a shift in the degree of reallocation both  
97 through evolutionary time and across species in extant plants.

98  
99 The physiology and phylogeographic patterns of  $C_4$  thus suggest multiple environmental  
100 drivers might have interacted to select for  $C_4$  evolution. Our goal in this paper is to tease  
101 apart the selective pressures that led to the evolution of  $C_4$  photosynthesis initially, its  
102 global expansion 5-10 MYA, and its current distribution within the framework of an  
103 optimality model in which the plant makes allocation “decisions” in order to maximize its  
104 photosynthetic assimilation rate. To do this, we revisit the temperature- $CO_2$  crossover  
105 approach and integrate the effects of water limitation, light, optimal allocation decisions,  
106 and the interactions between these in a single model. Specifically, our model advances  
107 our understanding of  $C_4$  evolution in four important ways. First, few modeling studies  
108 have explicitly considered multiple factors and their interactions. We incorporate water  
109 availability and light intensity as selective factors in addition to temperature and  $CO_2$ .  
110 Second, the hypothesis that  $C_4$  photosynthesis has a higher WUE than  $C_3$  implicitly

111 relies on an optimality argument to balance carbon gain and water loss (Medlyn et al.  
112 2011, Prentice et al. 2014), yet the role of optimal stomatal conductance in mediating  
113 selective pressures due to water limitation during the evolution of C<sub>4</sub> plants remains  
114 largely unexplored (but see Way et al. 2014). Most previous models assume *a priori* that  
115 C<sub>4</sub> grasses have lower stomatal conductance. Instead, we let both stomatal resistance  
116 and leaf/fine-root allocation emerge endogenously from the model using optimality  
117 arguments. Third, we include the cost of the C<sub>4</sub> pathway in the light reactions (2  
118 additional ATP per CO<sub>2</sub> fixed; Hatch 1987, von Caemmerer 2000), which previous  
119 models did not explicitly consider (Chen et al. 1994, Ehleringer et al. 1997, Collatz et al.  
120 1992, Osborne & Sack 2012). Finally, we consider reallocation of nitrogen from the dark  
121 reactions to the light reactions, which can change the tradeoffs between photosynthesis  
122 and water use by C<sub>4</sub> grasses.

123

## 124 **Model construction**

### 125 ***Overview of the model***

126 Different modeling scenarios are used to examine the advantage of C<sub>4</sub> during the initial  
127 origin, expansion and current distribution of C<sub>4</sub> photosynthesis. Initially, we assume that  
128 the CCM is the only difference between C<sub>3</sub> and C<sub>4</sub>. This comparison corresponds to two  
129 closely related species whose other traits have not had time to diverge in response to  
130 differential selection pressures. Next, we examine shifts in N allocation between light and

131 dark reactions of  $C_4$ , which may have happened in further divergence of  $C_3$  and  $C_4$  after  
132 the CCM evolved.

133

134 The soil-plant-air water continuum was incorporated in  $C_3$  photosynthesis models  
135 (Farquhar et al. 1980) and  $C_4$  models (von Caemmerer 2000) to examine interactions of  
136  $CO_2$ , water availability, light and temperature. We used the optimality approach of  
137 Givnish (1986), where  $C_3$  and  $C_4$  plants optimize stomatal resistance and leaf/fine-root  
138 allocation to balance carbon gain and water loss. A full model description is in  
139 Supplementary Material I. The model derivation using Mathematica (Wolfram Research,  
140 Inc.) and methods for numerical solutions are in Supplementary Material II.

#### 141 *$C_3$ photosynthesis model*

142 Considering the steady state of  $CO_2$  diffusion in mesophyll cells, we get:

$$A_n = \frac{C_a - C_m}{r_s + r_m} \quad , \quad (1)$$

144 where  $A_n$  is the net assimilation rate,  $C_a$  and  $C_m$  are the atmospheric and mesophyll  $CO_2$   
145 mixing ratios, and  $r_s$  and  $r_m$  is the stomatal and mesophyll resistance (the inverse of  
146 stomatal or mesophyll conductance).  $A_n$  is computed using the FvCB model (Farquhar et  
147 al. 1980) and is the minimum of two limitation states (eq. (4)): the Rubisco carboxylation  
148 (dark reaction) limitation state ( $A_c$ ) (eq. (2)), low  $CO_2$  and high light intensity cause a  
149 saturating supply of substrate (RuBP) for Rubisco, and reaction rate is controlled by the  
150 enzyme kinetics of Rubisco; the RuBP regeneration (light reaction) limitation state( $A_j$ )

151 (eq. (3)), when light intensity is low and RuBP availability limits the reaction rate. The  
152 assimilation rates are given by:

$$A_c = \frac{V_{cmax,\psi_l}(C_m - \Gamma^*)}{C_m + K_c(1 + \frac{O_m}{K_o})} - R_d \quad (2)$$

$$A_j = \frac{J_{max,\psi_l}(C_m - \Gamma^*)}{4.5C_m + 10.5\Gamma^*} - R_d \quad (3)$$

155  $A_n = \min(A_c, A_j)$  , (4)

156 where  $V_{cmax,\psi_l}$  is maximum velocity of Rubisco carboxylation (the subscript  $\psi_l$  denotes  
157 it's a function of leaf water potential),  $J_{max,\psi_l}$  is maximum rate of electron transport at a  
158 specific light intensity,  $R_d$  is the mitochondrial respiration rate in the daytime and  $\Gamma^*$  is  
159 CO<sub>2</sub> compensation point of photosynthesis.  $O_m$  is O<sub>2</sub> concentration in the mesophyll cell,  
160 which is assumed equal to atmospheric O<sub>2</sub>.  $K_c$  and  $K_o$  are the Michaelis-Menten  
161 constants of Rubisco for CO<sub>2</sub> and O<sub>2</sub>.

162

### 163 ***C<sub>4</sub> photosynthesis model***

164 For the C<sub>4</sub> pathway, we consider the steady state mixing ratio of CO<sub>2</sub> in both mesophyll  
165 ( $C_m$ ) and bundle sheath cells ( $C_{bs}$ ), which gives us two equations:

$$A_n = V_p - g_{bs}(C_{bs} - C_m) \quad (5)$$

167  $A_n = \frac{(C_a - C_m)}{(r_s + r_m)} + R_{dm}$  , (6)

168 where  $g_{bs}$  is the bundle sheath conductance,  $V_p$  is the PEP carboxylation rate,  
169 ( $g_{bs}(C_{bs} - C_m)$ ) represents bundle sheath leakage from bundle sheath cells back to  
170 mesophyll and  $R_{dm}$  are the daytime mitochondrial respiration rate in mesophyll cells.



171 The PEP carboxylation rate  $V_p$  is limited by either PEPc carboxylation (eq. (7)), which  
 172 follows a Michaelis-Menten type or PEP regeneration (eq. (8))

$$V_p = \frac{V_{pmax,\psi_l} C_m}{C_m + K_p} \quad (7)$$

$$V_p = x J_{max} / 3 \quad , \quad (8)$$

175 where  $V_{pmax,\psi_l}$  is maximal PEPc carboxylation rate,  $K_p$  is the Michaelis-Menten coefficient  
 176 of PEPc for CO<sub>2</sub> and  $x$  is the fraction of total electron transport could be used for the PEP  
 177 regeneration, which represents the cost of the CCM. The denominator 3 in eq. (8) arises  
 178 due to the fact that regeneration of 1 molecule of PEP needs 2 additional ATP, which is 3  
 179 additional electrons transported. Thus, equations (8) and (10) incorporate the cost of C<sub>4</sub>  
 180 pathway.  $A_c$  and  $A_j$  of C<sub>4</sub> are given by

$$A_c = \frac{V_{cmax,\psi_l} (C_{bs} - \Gamma^*)}{C_{bs} + K_c (1 + \frac{O_{bs}}{K_o})} - R_d \quad (9)$$

$$A_j = \frac{(1-x) J_{max,\psi_l} (C_{bs} - \Gamma^*)}{4.5 C_{bs} + 10.5 \Gamma^*} - R_d \quad (10)$$

183 which is obtained by substituting  $C_m$  in eq. (2) and (3) with  $C_{bs}$ .

184 Based on equations (7), (8), (9) and (10),  $A_n$  of C<sub>4</sub> is limited by four states as follows:

$$A_n = \min(A_{cc}, A_{cj}, A_{jc}, A_{jj}) \quad . \quad (11)$$

186 Here,  $A_{cc}$  is RuBP carboxylation and PEPc carboxylation limited rate;  $A_{cj}$  is RuBP  
 187 carboxylation and PEP regeneration limited rate;  $A_{jc}$  is PEP carboxylation and RuBP  
 188 regeneration limited rate; and  $A_{jj}$  is limited by PEP regeneration and RuBP regeneration  
 189 limited rate.

190

191 ***Hydraulic system***

192 Eq. (12) describes the soil-plant-air continuum (Givnish 1986). At equilibrium, the rate of  
 193 water loss through transpiration equals the rate of water absorption by the roots:

$$\frac{EfN}{\rho} = k(1-f)N(\psi_l - \psi_s) \quad , \quad (12)$$

195 where  $\psi_s$  is soil water potential,  $k$  is the effective root hydraulic conductivity,  $N$  is the total  
 196 biomass of fine root and leaves,  $\rho$  is the leaf mass density ( $\text{gcm}^{-2}$ ) and  $E$  is the  
 197 transpiration rate per leaf area.  $E$  could be written as  $\delta/r_s$ , where  $\delta$  is the water partial  
 198 pressure deficit between saturated leaf surface and the atmosphere. Thus, leaf water  
 199 potential ( $\psi_l$ ) is a function of  $r_s$  and leaf/fine-root allocation ( $f$ , defined as investment into  
 200 leaves/total investment in leaves and fine root)).

$$\psi_l = \psi_s - \frac{f\delta}{\rho k r_s (1-f)} \quad (13)$$

202

### 203 *Inhibition of photosynthesis by water stress*

204 Reduced leaf water potential inhibits photosynthesis (Tezara et al. 1999, Lawlor &  
 205 Cornic 2002, Tang 2002). We model this cost of transpiration as Weibull-type  
 206 vulnerability curves relating leaf  $\psi_l$  and photosynthetic parameters (Vico & Porporato  
 207 2008):

$$208 \quad V_{cmax,\psi_l} = V_{cmax} e^{-\left(\frac{-\psi_l}{d_v}\right)^{b_v}} \quad (14)$$

$$209 \quad J_{max,\psi_l} = J_{max} e^{-\left(\frac{-\psi_l}{d_j}\right)^{b_j}} \quad (15)$$

$$210 \quad V_{pmax,\psi_l} = V_{pmax} e^{-\left(\frac{-\psi_l}{d_p}\right)^{b_p}} \quad , \quad (16)$$

211 where  $b$  and  $d$  are curve fitting parameters. Since  $\psi_l$  is a function of  $r_s$  and  $f$ , all those  
 212 parameters are functions of  $r_s$  and  $f$ .

213

214 ***Optimal stomatal resistance and optimal allocation of energy between leaves and fine***

215 ***roots***

216 We assume that the plant adjusts the  $r_s$  and  $f$  to optimize the total carbon gain by

217  $A_{\text{total}} = fNA_n/\rho$  , (16)

218 where  $\rho$  is the leaf mass density ( $\text{g cm}^{-2}$ ). As a simplifying assumption, we assume  $N$  and

219  $\rho$  are fixed (similar to Givnish, 1986). Effectively, we consider the optimization problem

220 faced by the plant in a given instance during its growth, where its size (of which  $N$  is a

221 proxy) can be regarded as a constant. Clearly, during plant growth, the assimilate will be

222 turned into plant biomass, but the instantaneous optimization problem will still yield the

223 optimal growth path, as it maximized the growth rate at any given time. Finally, we regard

224  $\rho$  as a species-specific trait that changes at a slower time-scale than  $r_s$  and  $f$ . The first

225 order optimality conditions for  $r_s$  and  $f$  are given by (Givnish 1986):

226  $\frac{\partial(fA_n)}{\partial r_s} = f \frac{\partial A_n}{\partial r_s} = 0$  (17)

227  $\frac{\partial(fA_n)}{\partial f} = A_n + f \frac{\partial(A_n)}{\partial f} = 0$  . (18)

228 We checked the second order derivative to ensure that the numerical solutions to the

229 first order conditions were maxima.

230

231 ***Allocation of nitrogen***

232 We examine how nitrogen allocation between RuBP carboxylation and RuBP  
233 regeneration in C<sub>4</sub> grasses affect competitive advantage over C<sub>3</sub> grasses. Despite great  
234 variation in  $V_{cmax}$  and  $J_{max}$  based on the total leaf nitrogen content within C<sub>3</sub> plants,  
235 Wullschleger (1993) found a mean of  $J_{max}/V_{cmax}=2.1$  across 109 C<sub>3</sub> species, which we  
236 use as a baseline for C<sub>3</sub> and C<sub>4</sub> pathways in analyzing the initial evolution of C<sub>4</sub>. Then,  
237 we used  $J_{max}/V_{cmax}=4.5$  for C<sub>4</sub> (Vico & Porporato 2008, Osborne & Sack 2012) to  
238 analyze the role that nitrogen reallocation played in the evolutionary trajectory of C<sub>4</sub>  
239 plants. In determining the values of  $J_{max}$  and  $V_{cmax}$ , we used a simplified stoichiometry:  
240 we consider the total of  $J_{max}$  and  $V_{cmax}$  as a constant to hold nitrogen concentration  
241 constant (Vico & Porporato 2008, Osborne & Sack 2012). Two assumptions are  
242 underlying this simplified stoichiometry: (1) investing one molecule of nitrogen to the dark  
243 reactions will increase of  $V_{cmax}$  equal to the increase of  $J_{max}$  by investing one molecule of  
244 nitrogen to the light reactions; (2) nitrogen allocation to photorespiration and to the CCM  
245 balanced each other.

246

### 247 ***Modeling scenarios***

248 We modeled the photosynthesis rates of C<sub>3</sub> and C<sub>4</sub> under temperature range from 10 °C  
249 to 40 °C with an interval of 5 °C, under CO<sub>2</sub> mixing ratios ranging from 200 ppm to 600  
250 ppm with an interval of 50 ppm, under different water conditions (VPD=0.001, 1, 2, 3,  
251 4kPa corresponding to soil water potential ( $\Psi_s$ ) =0, -0.5, -1, -1.5, -2 MPa) and under  
252 different light intensities (1400, 1000, 600, 200, 100  $\mu\text{mol photons m}^{-2}\text{s}^{-1}$ ). We consider

253 VPD=0.001 kPa and  $\Psi_S = 0$  MPa as saturated water condition and light intensity of 1400  
254  $\mu\text{mol photons m}^{-2} \text{s}^{-1}$  as an average saturated light intensity of a day.

255

## 256 **Results**

### 257 **C<sub>3</sub>/C<sub>4</sub> crossover temperatures and environmental variations**

258 We numerically solved for assimilation-based crossover temperatures, defined as the  
259 temperature at which assimilation by the C<sub>4</sub> pathway starts exceeding that by the C<sub>3</sub>,  
260 across the full range of CO<sub>2</sub>, evaporative conditions, and soil-water availability, all under  
261 saturated light. In the first scenario (Fig. 1a), we assume the same allocation of N to light  
262 and dark reactions in the C<sub>3</sub> and C<sub>4</sub> plants (specifically,  $J_{max}/V_{cmax}=2.1$  for both). Across  
263 all CO<sub>2</sub> concentrations, the crossover temperature decreases as water limitation  
264 increased. Under the most extreme water-stressed conditions (VPD = 4 kPa,  $\Psi_S = -2$   
265 MPa), the crossover temperatures are all below 5°C, even under a CO<sub>2</sub> of 600 ppm, and  
266 C<sub>4</sub> plants have an advantage at all temperatures.

267

268 In our second scenario, we assume a reallocation between RuBP regeneration and  
269 RuBP carboxylation processes in C<sub>4</sub> by changing the  $J_{max}/V_{cmax}$  ratio to 4.5 while keeping  
270 it at 2.1 in C<sub>3</sub> (Fig. 1b). The crossover temperatures are lower than the first scenario  
271 under saturated water conditions through to VPD = 3 kPa and  $\Psi_S = -1.5$  MPa, suggesting  
272 that reallocation increases the advantage of C<sub>4</sub> in those conditions. Under low CO<sub>2</sub> and  
273 low water availability (e.g. CO<sub>2</sub>=300 ppm, VPD = 3 kPa and  $\Psi_S = -1.5$  MPa or all CO<sub>2</sub>

274 concentrations with  $VPD = 4$  kPa and  $\Psi_S = -2$  MPa), however, crossover temperatures  
275 are comparatively higher than those of  $J_{max}/V_{cmax}=2.1$ , showing that reallocation  
276 decreases the  $C_4$  advantage under water limitation and low  $CO_2$ .  
277  
278 Under saturated soil water availability, low VPD, and identical light- and dark-reaction  
279 allocation of  $C_3$  and  $C_4$ , crossover temperatures decrease along with increasing light  
280 intensity (Fig. 1c). An increase in light intensity provides a larger relative benefit for  $C_4$  at  
281 low  $CO_2$ , because  $C_3$  photosynthesis is  $CO_2$  limited and  $C_4$  is light limited. The crossover  
282 temperatures under all light intensities reach  $40^\circ C$ , when  $CO_2$  is above 350 ppm. With  
283 the change of  $J_{max}/V_{cmax}$  (Fig. 1d), crossover temperatures decrease at every light  
284 intensity. The high-light result in Fig. 1d predicts a  $C_3/C_4$  crossover temperature of  $23^\circ C$   
285 under 380 ppm, similar to previous models that did not explicitly account for water stress  
286 (Ehleringer et al. 1997, Collatz et al 1998).

287

### 288 **Stomatal resistance and leaf root allocation**

289 Under all scenarios and both for  $C_3$  and  $C_4$  plants, optimal  $r_s$  first decreases as  
290 temperature increases, and then increases and it increases monotonically with  
291 increasing  $CO_2$  (Fig. 2 a, c, e). Throughout the range of water availability we considered,  
292 optimal  $r_s$  is higher for  $C_4$  than  $C_3$  at temperature ranging from  $10$  to  $40^\circ C$  and  $CO_2$   
293 ranging from 200 to 600 ppm. The optimal  $f$  has a similar relationship of an inverse  
294 U-shape curve along with temperature. Increasing  $CO_2$  results in an increase of leaf

295 allocation (Fig. 2 b, d, f). Optimal  $f$  for  $C_3$  is always higher than that for  $C_4$  under different  
296 water availability and  $CO_2$ .  $f$  decreases as intensity of water limitation increase. Results  
297 are the same for  $C_4$  with a  $J_{max}/V_{cmax}$  of 4.5 (not shown).

298

### 299 **RuBP carboxylation versus regeneration limitations**

300 The  $C_3$  pathway transitions from being  $CO_2$  limited under low temperatures to light  
301 limited under high temperatures. The jumps in  $r_s$  and  $f$  in Fig. 2 correspond to the  
302 transition from RuBP carboxylation limited assimilation ( $A_c$ ) to RuBP regeneration limited  
303 assimilation ( $A_j$ ) of  $C_3$ , and the transition from RuBP carboxylation and PEP regeneration  
304 limited ( $A_{jc}$ ) to RuBP regeneration and PEP regeneration limited assimilation ( $A_{jj}$ ) of  $C_4$ .

305 The transition temperature decreases as  $CO_2$  increases. In the Fig. S1,  $A_c$ ,  $A_j$ ,  $A_{cc}$ ,  $A_{cj}$ ,  $A_{jc}$   
306 and  $A_{jj}$  are plotted together under several environmental scenarios, using both  
307  $J_{max}/V_{cmax}=2.1$  and 4.5 for  $C_4$ . With  $J_{max}/V_{cmax}=2.1$ ,  $C_4$  is light limited in all the  
308 environmental conditions. With  $J_{max}/V_{cmax}=4.5$ ,  $C_4$  starts to be limited by  $CO_2$  under low  
309 temperatures and to be limited by light under high temperatures.

310

### 311 **Quantifying differences in C-assimilation rate**

312 While crossover temperatures allow for a clear diagnostic of comparative assimilation,  
313 they do not demonstrate the degree of difference. To this end, we calculated the net  
314 assimilation rate difference between  $C_4$  and  $C_3$ ,  $\Delta A_n$  (net assimilation of  $C_4$  minus that of  
315  $C_3$ ), under different conditions (Fig. 3 and 4). Under a  $CO_2$  concentration of 200 ppm and

316 saturated light,  $\Delta A_n$  is higher under moister conditions than water-limited conditions (Fig.  
317 3a). In contrast, under higher CO<sub>2</sub> concentrations (400 and 600 ppm), C<sub>4</sub> has an  
318 advantage only in serious water limited conditions, which leave a relatively small scope  
319 for C<sub>4</sub> to evolve (areas where  $\Delta A_n > 0$  in Fig. 3c, e). This result is due to the fact that C<sub>3</sub>  
320 photosynthesis has a greater proportional increase in assimilation from 200 to 400 and  
321 600 ppm CO<sub>2</sub>. However, the change of  $J_{max}/V_{cmax}$  increases both the  $\Delta A_n$  and space for  
322 C<sub>4</sub> advantage (Fig. 3 b, d, f). Similar with water availability, at 200 ppm,  $\Delta A_n$  is highest  
323 under saturated light, and decreases as light intensity decreases (Fig. 4a).  $\Delta A_n$  is  
324 relatively constant and negative across all light intensities at 400 ppm CO<sub>2</sub> (Fig. 4c). The  
325 change of  $J_{max}/V_{cmax}$  also increases the  $\Delta A_n$  and space for C<sub>4</sub> advantage under different  
326 light intensities (Fig. 4 b, d).

327

328 Finally, we calculate the photosynthesis rates of the two pathways under conditions often  
329 encountered in today's grasslands to look at the effect of nitrogen reallocation between  
330 RuBP carboxylation and regeneration: CO<sub>2</sub> =400 ppm, saturated light with three water  
331 conditions (Fig. 5). With  $J_{max}/V_{cmax} = 2.1$  for both C<sub>3</sub> and C<sub>4</sub>, the C<sub>4</sub> assimilation rate is  
332 rarely higher than C<sub>3</sub>, which indicates C<sub>4</sub> does not have an obvious advantage under  
333 current CO<sub>2</sub> from saturated water conditions through to VPD = 2 kPa and  $\Psi_S = -1$  MPa in  
334 current grassland because of the cost of the CCM. However, with  $J_{max}/V_{cmax} = 4.5$  for C<sub>4</sub>,  
335 C<sub>4</sub> does have an advantage over C<sub>3</sub> at temperatures above 25 °C.

336



## 337 **Discussion**

338 Changes in the climate that occurred towards the end of the Oligocene about 30 MYA  
339 led to a drier Earth; the consequent increase in wildfires and seasonal droughts forced  
340 the forests then covering the earth to give way to entirely new biomes: the grasslands  
341 and savannas (Strömberg 2011). The open and drier habitats populated by these  
342 ancestral grasses would have had higher temperatures due to greater incident radiation  
343 and an uncoupling from the turbulent mixing of air above the grass canopy, which  
344 exacerbate physiological challenges by increasing water loss from the leaf to the  
345 atmosphere. Furthermore, higher temperatures and a decrease in atmospheric CO<sub>2</sub>  
346 would have increased photorespiration in these ancestral C<sub>3</sub> grasses. Therefore,  
347 grasses encountered several environmental changes during the evolution of C<sub>4</sub>: CO<sub>2</sub>,  
348 temperature, water availability, increasing irradiance, and the reallocation of nutrients as  
349 the CCM evolved. Previous work has considered most of these factors separately,  
350 meaning potential interactions between them remain unexplored. We took a  
351 comprehensive approach to elucidate the multi-faceted selective pressures on early C<sub>4</sub>  
352 grassland evolution, the expansion of C<sub>4</sub> 5-10 MYA and current distribution in an  
353 optimization framework.

354

355 **Selective pressures and interactions among CO<sub>2</sub>, temperature, water availability and**  
356 **light**

357 We find that water limitation is the primary selective pressure for the evolution of C<sub>4</sub>  
358 grasses when CO<sub>2</sub> is above 400 ppm, suggesting that the environmental pressures for  
359 C<sub>4</sub> evolution were in place during the early expansion of grass-dominant biomes. During  
360 the early origins of C<sub>4</sub> (25-30 MYA), estimates of CO<sub>2</sub> concentrations are typically above  
361 400 ppm (Cerling et al. 1997, Kürschner et al. 2008, Edwards & Smith 2010). Under  
362 saturated water conditions, the predicted crossover temperature at 400 ppm is above 40  
363 °C because the benefits of the CCM are outweighed by the costs, indicating there is little  
364 room for C<sub>4</sub> to evolve. However, as water becomes more limited, the predicted crossover  
365 temperature ranges between 20 °C to 30 °C, while the C<sub>4</sub> advantage ( $\Delta A_n$ ) becomes  
366 increasingly larger due to the higher WUE conferred by the C<sub>4</sub> CCM. Our work therefore  
367 adds to the growing body of evidence that the primary selective factor for C<sub>4</sub> grass  
368 evolution was enhanced carbon gain under water limited conditions, in accordance with  
369 phylogenetic evidence (Edwards et al. 2010, Pau et al. 2013), and what has generally  
370 been believed to be the selective force behind the evolution of C<sub>4</sub> in dicotyledonous  
371 plants (Sage 2004).

372  
373 In a recent physiological model, Osborne and Sack (2012) also suggest a hydrological  
374 underpinning to the competitive success of C<sub>4</sub> grasses, but found a much smaller  
375 environmental window for C<sub>4</sub> evolution than we did. At 400 ppm and  $\Psi_s = -1$  MPa, they  
376 showed that C<sub>4</sub> hydraulic conductance must be twice that of C<sub>3</sub> grasses for C<sub>4</sub> grasses to  
377 achieve greater carbon uptake. In contrast, we find a clear C<sub>4</sub> advantage under these—

378 and even drier— conditions by allowing for optimal solutions of  $r_s$  and  $f$  to maximize  $A_n$ ,  
379 while keeping plant hydraulic conductance equal across  $C_3$  and  $C_4$ . Our results do not  
380 contradict the idea that larger bundle sheaths and smaller IVD— which were  
381 prerequisites for  $C_4$  evolution (Griffiths et al. 2012, Christin et al. 2013) — led to greater  
382 hydraulic conductance among  $C_3$  grass progenitors (Griffiths et al. 2012), but they do  
383 suggest that greater hydraulic conductance is not necessary to give  $C_4$  plants an  
384 advantage once the CCM evolved.

385  
386 As  $CO_2$  decreased through the Miocene,  $C_4$  grasses saw a large-scale global expansion  
387 5-10 MYA. Our results suggest that at this time, the main selective force for  $C_4$  evolution  
388 shifted from water limitation to low  $CO_2$  and, to a lesser extent, light intensity. Low  $CO_2$   
389 provides a clear advantage for  $C_4$  under all water availability and light intensity regimes.  
390 Under low  $CO_2$ , the greatest  $\Delta A_n$  occurs in relatively saturated-water and  
391 mild-water-limited conditions, opposite what is seen under high  $CO_2$ , and suggesting  
392 water limitation is not as effective of a selective pressure under low  $CO_2$ . Our results are  
393 consistent with previous studies showing that low  $CO_2$  (200-300 ppm) is a selective  
394 pressure for  $C_4$  species (e.g. Ehleringer et al. 1997).

395  
396 Since light intensity is not an important selective force under high  $CO_2$ , it seems likely  
397 that  $C_4$  grasses could not dominate open grasslands, except in very arid areas, while  
398  $CO_2$  was still high. However, when  $CO_2$  decreased to  $\sim 300$  ppm and below (Cerling et al.

399 1997, Kürschner et al. 2008, Edwards & Smith 2010), high light intensity provided an  
400 enhanced advantage for C<sub>4</sub> (crossover temperature decreases, and  $\Delta A_n$  increases).  
401 These findings give mechanistic support to the idea that between the initial evolutionary  
402 events leading to the emergence of C<sub>4</sub> grasses and the large-scale expansion 5-10  
403 MYA, C<sub>4</sub> radiation idled in small pockets of selective favorability as CO<sub>2</sub> concentrations  
404 declined through the Miocene (Christin et al. 2008, Sage 2004). As CO<sub>2</sub> declined, the  
405 high light levels inherent to grassland systems gave C<sub>4</sub> photosynthesis an increasing  
406 selective advantage, leading to broader geographic and evolutionary radiation.

407

#### 408 **The role of nitrogen allocation in C<sub>4</sub> evolution and expansion**

409 We assumed that during the early evolution of the CCM, both C<sub>3</sub> and C<sub>4</sub> plants had a  
410 similar balance of nitrogen across the light and dark reactions. Subsequent to the  
411 evolution of CCM, selection could favor the reallocation of nitrogen from dark to light  
412 reactions (increasing  $J_{max}/V_{cmax}$ ). In general, CCMs allow for less investment in  
413 nitrogen-rich Rubisco (Ku et al. 1979, Christin & Osborne 2014), and the nitrogen not  
414 used for Rubisco could be either reinvested in light harvesting machinery, or simply not  
415 used at all. Increasing  $J_{max}/V_{cmax}$  almost always increases the photosynthesis rate of C<sub>4</sub>  
416 grasses (Fig. S2), and therefore could lead to a competitive advantage over C<sub>3</sub> grasses  
417 as well as C<sub>4</sub> grasses that do not reallocate. Assuming there is little cost or no genetic  
418 constraints for reallocation, the selection pressure to reallocate would have been  
419 strongest when CO<sub>2</sub> was high, i.e., during the initial evolutionary events in the

420 Oligocene/Miocene, when the CCM alone does not give C<sub>4</sub> a large advantage (low  $\Delta A_n$   
421 in Fig. 3c). When CO<sub>2</sub> was low during the C<sub>4</sub> radiation 5-10 MYA, however, the CCM  
422 alone would give C<sub>4</sub> an advantage and reallocation would not change the competitive  
423 balance between C<sub>3</sub> and C<sub>4</sub>. As CO<sub>2</sub> remained low through to the Pleistocene, selection  
424 for nitrogen reallocation to the light reactions would lessen further, especially during the  
425 CO<sub>2</sub> minima of the Pleistocene glacial periods (~ 180 ppm). In this context, an interesting  
426 question is whether the high CO<sub>2</sub> of the last 150 years is selecting for increased  
427  $J_{max}/V_{cmax}$  today.

428  
429 Modeling studies have assumed a high  $J_{max}/V_{cmax}$  for C<sub>4</sub> photosynthesis, while the few  
430 empirical estimates of  $J_{max}/V_{cmax}$ , in C<sub>4</sub> plants paint a more variable picture for extant C<sub>4</sub>  
431 species. C<sub>4</sub> photosynthesis models assumed  $J_{max}/V_{cmax}$  to be around 4.5 with the same  
432 sum of  $J_{max}$  and  $V_{cmax}$  for C<sub>3</sub> and C<sub>4</sub> (Vico & Porporato 2008, using a fit from Collatz et al.  
433 1992, Osborne & Sack 2012). C<sub>4</sub> species have lower Rubisco content and higher  
434 chlorophyll and thylakoid content, giving evidence of reallocation in extant C<sub>4</sub> species  
435 (Tissue et al. 1995, Ghannoum et al. 2010, Vogan & Sage 2012). In contrast,  
436 empirically-based estimates of C<sub>4</sub>  $J_{max}/V_{cmax}$  range from less than 2 to above 6, with a  
437 mean of about 4 (Domingues et al. 2007, Massad et al. 2007, Grant et al. 2007,  
438 Kathilankal et al. 2011, Ye et al. 2013, Ge et al. 2014), which is lower than model  
439 assumptions, but still higher than the mean  $J_{max}/V_{cmax}$  estimates for C<sub>3</sub> plants of 2.1  
440 (Wullschleger 1993). Our results suggest that nitrogen availability and environmental

441 factors (water, CO<sub>2</sub>, light) have likely affected natural variation in  $J_{max}/V_{cmax}$  observed in  
442 extant species, as well as through evolutionary time.

443

## 444 **Conclusion**

445 Our results show that by optimizing carbon gain over water loss, we can tease apart the  
446 selective factors for C<sub>4</sub> evolution in the grasses in both the relatively high CO<sub>2</sub> conditions  
447 of the late Oligocene/Early Miocene and the late Miocene expansion. At any CO<sub>2</sub>  
448 concentration above 400 ppm, water limitation was the primary selective factor for C<sub>4</sub>  
449 evolution, and even at 600 ppm there is room for C<sub>4</sub> evolution under the driest  
450 conditions. Furthermore, we find that the CCM alone leads to enough of a reduction in  
451 water use that there would have been little selection for increased hydraulic conductance  
452 within C<sub>4</sub> grasses. Below 400 ppm, CO<sub>2</sub> and to a lesser extent light, become the  
453 dominant selective pressures, leading to gains in net C<sub>4</sub> carbon assimilation that greatly  
454 exceeded those under higher CO<sub>2</sub>. We therefore have a plausible physiological  
455 explanation for why C<sub>4</sub> grasses could have evolved hand-in-hand with the grassland  
456 biome, even though they did not achieve ecological dominance for many millions of  
457 years until CO<sub>2</sub> concentrations dropped.

458

459 C<sub>4</sub> photosynthesis first evolved in the grasses 25 – 32 MYA, and many subsequent and  
460 independent evolutionary origins occurred well into the Pleistocene 2.8 MYA. Each  
461 evolutionary origin potentially represents both different selective pressures and

462 taxonomic (genetic) constraints as climate and CO<sub>2</sub> changed. Taking the Chloridoideae  
463 as an example, our model suggests that initial evolution of C<sub>4</sub> photosynthesis 25 – 32  
464 MYA (Christin et al. 2008) was driven by aridity, acting to decrease stomatal  
465 conductance that increased photorespiration in C<sub>3</sub> progenitors initially, and led to higher  
466 water use efficiency upon the evolution of the CCM. Also at this point, there would have  
467 been strong selection for reallocation of nitrogen from the dark reactions to the light  
468 reactions. The large radiation of C<sub>4</sub> within the Chloridoideae that occurred 5 – 10 MYA  
469 was likely driven by low CO<sub>2</sub> and high light. There would have been much less selective  
470 pressure to reallocate N at this point, but such a reorganization was likely already in  
471 place within the clade. In contrast, for the lineages that first evolved C<sub>4</sub> in the late  
472 Miocene (e.g. *Stipagrostis*, *Eriachne*, *Neurachne*), CO<sub>2</sub> would have been the primary  
473 impetus for C<sub>4</sub> evolution, but for these lineages there would have been little impetus to  
474 reallocate nitrogen until the dawn of the industrial revolution. In many ways this  
475 examination of nitrogen allocation is speculative, but it nonetheless illustrates how we  
476 can use comprehensive physiological models to tease apart variation in C<sub>4</sub> physiology  
477 along the evolutionary trajectory. Furthermore, by selecting extant species within select  
478 lineages, nitrogen stoichiometry can be examined empirically, ultimately providing an  
479 integrative view of the selection pressures that led to the extant physiology and  
480 distribution of C<sub>4</sub> plants.

481

482 **Acknowledgements**

483 We are grateful for support from the University of Pennsylvania as well as undying  
484 assistance from Qing Zhang, Jemma Lloyd-Helliker and Ebru Erdem-Akçay.

485

## 486 **References**

- 487 1. von Caemmerer, S. (2000). Biochemical models of photosynthesis. In *Techniques in*  
488 *Plant Sciences*. CSIRO Publishing, Colingwood, Australia, pp 91–122.
- 489
- 490 2. Cerling, T.E., Harris, J.M., MacFadden, B.J., Leakey, M.G., Quade, J., Eisenmann, V.  
491 & Ehleringer, J.R. (1997). Global vegetation change through the Miocene/Pliocene  
492 boundary. *Nature*, 389, 153-158.
- 493
- 494 3. Chen, D.-X., Coughenour, M.B., Knapp, A.K. & Owensby, C.E. (1994). Mathematical  
495 simulation of C<sub>4</sub> grass photosynthesis in ambient and elevated CO<sub>2</sub>. *Ecol. Model.*, 73,  
496 63–80.
- 497
- 522 4. Christin P.A., Besnard G., Samaritani E., Duvall M.R., Hodkinson T.R., Savolainen V. &  
523 Salamin N. (2008). Oligocene CO<sub>2</sub> decline promoted C<sub>4</sub> photosynthesis in grasses.  
524 *Curr. Biol.*, 18, 37–43.
- 525
- 526 5. Christin, P.A., Osborne, C.P., Chatelet, D.S., Columbus, J.T., Besnard, G., Hodkinson,  
527 T.R., Garrison, L.M., Vorontsova, M.S. & Edwards, E.J. (2013). Anatomical enablers  
528 and the evolution of C<sub>4</sub> photosynthesis in grasses. *Proc. Natl. Acad. Sci. USA*, 110,  
529 1381-1386.
- 530
- 531 6. Christin, P.A. & Osborne, C.P. (2014). Tansley Review. The evolutionary ecology of  
532 C<sub>4</sub> photosynthesis. *New Phytol.*, 204, 765-781.
- 533
- 534 7. Collatz, G.J., Berry, J.A. & Clark, J.S. (1998). Effects of climate and atmospheric CO<sub>2</sub>  
535 partial pressure on the global distribution of C<sub>4</sub> grasses: present, past, and future.  
536 *Oecologia*, 114, 441-454.
- 537
- 538 8. Collatz, G.J., Ball, J.T., Grivet, C. & Berry, J.A. (1992). Coupled  
539 photosynthesis-stomatal conductance model for leaves of C<sub>4</sub> plants. *Aust. J. Plant*  
540 *Physiol.*, 19, 519-538.
- 541
- 542 9. Domingues, T.F., Martinelli, L.A. & Ehleringer, J.R. (2007). Ecophysiological traits of  
543 plant functional groups in forest and pasture ecosystems from eastern Amazônia,  
544 Brazil. *Plant Ecol.*, 193, 101-112.
- 545



- 546 10. Edwards, E.J., Osborne, C.P., Strömberg, C.A.E., Smith, S.A. & C4 Grasses  
547 Consortium. (2010). The Origins of C<sub>4</sub> Grasslands: Integrating Evolutionary and  
548 Ecosystem Science. *Science*, 328, 587-591.  
549
- 550 11. Edwards, E.J. & Smith, S.A. (2010). Phylogenetic analyses reveal the shady history  
551 of C<sub>4</sub> grasses. *Proc. Natl. Acad. Sci. USA*, 107, 2532-2537.  
552
- 553 12. Edwards, E.J. & Still, C.J. (2008). Climate, phylogeny and the ecological distribution  
554 of C<sub>4</sub> grasses. *Ecol. Lett.*, 11, 266-276.  
555
- 556 13. Ehleringer, J.R. & Monson, R.K. (1993). Evolutionary and ecological aspects of  
557 photosynthesis pathway variation. *Annu. Rev. Ecol. Syst.*, 24, 411-439.  
558
- 559 14. Ehleringer, J.R., Cerling, T.E. & Helliker, B.R. (1997). C<sub>4</sub> photosynthesis,  
560 atmospheric CO<sub>2</sub>, and climate. *Oecologia*, 112, 285-299.  
561
- 562 15. Farquhar, G.D., Von Caemmerer, S. & Berry, J.A. (1980). A biochemical model of  
563 photosynthetic carbon dioxide assimilation in leaves of 3-carbon pathway species.  
564 *Planta*, 149, 78–90.  
565
- 566 16. Ge, Z.M., Zhang, L.Q., Yuan, L. & Zhang, C. (2014). Effects of salinity on  
567 temperature-dependent photosynthetic parameters of a native C<sub>3</sub> and a non-native  
568 C<sub>4</sub> marsh grass in the Yangtze Estuary, China. *Photosynthetica*, 52, 484–492.  
569
- 570 17. Ghannoum, O. (2009). C<sub>4</sub> photosynthesis and water stress. *Ann. Bot.*, 103, 635–644.  
571
- 572 18. Ghannoum, O., Evans, J.R. & von Caemmerer, S. (2010). Nitrogen and water use  
573 efficiency of C<sub>4</sub> plants. In: *C<sub>4</sub> photosynthesis and related CO<sub>2</sub> concentrating mechanisms*  
574 (eds. Raghavendra, A.S. & Sage, R.F.). Springer Science, The Netherlands, Dordrecht,  
575 pp. 129–146.  
576
- 577 19. Givnish, T.J. (1986). Optimal stomatal conductance, allocation of energy between  
578 leaves and roots, and the marginal cost of transpiration. In: *On the Economy of Plant*  
579 *Form and Function* (ed. Givnish TJ). Cambridge University Press, Cambridge, pp.  
580 171–213.  
581
- 582 20. Grant, R.F. & Flanagan, L.B. (2007). Modeling stomatal and nonstomatal effects of  
583 water deficits on CO<sub>2</sub> fixation in a semiarid grassland. *J. Geophys. Res.*, 112, G03011,  
584 doi:10.1029/2006JG000302.  
585  
586

- 587 21. Griffiths, H., Weller, G., Toy, L. & Dennis, R.J. (2012). You're so vein: bundle sheath  
588 physiology, phylogeny and evolution in C<sub>3</sub> and C<sub>4</sub> plants. *Plant Cell Environ.*, 36, 249–  
589 261.  
590
- 591 22. Hatch, M.D. (1987). C<sub>4</sub> photosynthesis: a unique blend of modified biochemistry,  
592 anatomy and ultrastructure. *Biochim. Biophys. Acta*, 895, 81-106.  
593
- 594 23. Kathilankal, J.C., Mozdzer, T.J., Fuentes, J.D., McGlathery, K.J., D'Odorico, P. &  
595 Ziemann, J.C. (2011). Physiological responses of *Spartina alterniflora* to varying  
596 environmental conditions in Virginia marshes. *Hydrobiologia*, 669, 167-181.  
597
- 598 24. Ku, M.S.B., Schmitt, M.R. & Edwards, G.E. (1979). Quantitative determination of  
599 RuBP carboxylase-orygenase protein in leaves of several C<sub>3</sub> and C<sub>4</sub> plants. *J. Exp.*  
600 *Bot.*, 114, 89–98.  
601
- 602 25. Kürschner, W.M., Kvacek, Z. & Dilcher, D.L. (2008). The impact of Miocene  
603 atmospheric carbon dioxide fluctuations on climate and the evolution of terrestrial  
604 ecosystems. *Proc. Natl. Acad. Sci. U S A*, 105, 449-453.  
605
- 606 26. Lawlor, D.W. & Cornic, G. (2002). Photosynthetic carbon assimilation and associated  
607 metabolism in relation to water deficits in higher plants. *Plant Cell Environ.*, 25, 275–  
608 294.  
609
- 610 27. Massad, R.S., Tuzet, A. & Bethenod, O. (2007). The effect of temperature on C<sub>4</sub>-type  
611 leaf photosynthesis parameters. *Plant Cell Environ.*, 30, 1191-1204.  
612
- 613 28. Medlyn, B.E., Duursma, R.A., Eamus, D., Ellsworth, D.S., Prentice, I.C., Barton,  
614 C.V.M., Crous, K.Y., De Angelis, P., Freeman, M. & Wingate, L. (2011). Reconciling  
615 the optimal and empirical approaches to modelling stomatal conductance. *Glob.*  
616 *Chang Biol.*, 17, 2134-2144.  
617
- 618 29. Osborne, C. P. (2008). Atmosphere, ecology and evolution: what drove the Miocene  
619 expansion of C<sub>4</sub> grasslands? *J. Ecol.*, 96, 35-45.  
620
- 621 30. Osborne, C.P. & Freckleton, R.P. (2009). Ecological selection pressures for C<sub>4</sub>  
622 photosynthesis in the grasses. *Proc. Biol. Sci.*, 276, 1753-1760.  
623
- 624 31. Osborne, C.P. & Sack, L. (2012). Evolution of C<sub>4</sub> plants: a new hypothesis for an  
625 interaction of CO<sub>2</sub> and water relations mediated by plant hydraulics. *Philos. Trans. R.*  
626 *Soc. Lond. B. Biol. Sci.*, 367, 583-600.  
627

- 628 32. Pau, S., Edwards, E.J. & Still, C.J. (2013). Improving our understanding of  
629 environmental controls on the distribution of C<sub>3</sub> and C<sub>4</sub> grasses. *Glob. Chang Biol.*, 19,  
630 184-196.  
631
- 632 33. Prentice, I. C., Dong, N., Gleason, S.M., Maire, V. & Wright, I.J. (2014). Balancing the  
633 costs of carbon gain and water transport: testing a new theoretical framework for plant  
634 functional ecology. *Ecol. Lett.* 17, 82-91.  
635
- 636 34. Sage, R.F. (2004). The evolution of C<sub>4</sub> photosynthesis. *New Phytol.*, 161, 341-370.  
637
- 638 35. Sage, R.F., Sage, T.L. & Kocacinar F. (2012). Photorespiration and the evolution of  
639 C<sub>4</sub> photosynthesis. *Annu. Rev. Plant Biol.*, 63, 19-47.  
640
- 641 36. Strömberg, C.A.E. (2011). Evolution of grasses and grassland system. *Annu. Rev.*  
642 *Earth Planet Sci.*, 39, 517-544.  
643
- 644 37. Tang, A.C. (2002). Photosynthetic oxygen evolution at low water potential in leaf  
645 discs lacking an epidermis. *Ann. of Bot.*, 89, 861-870.  
646
- 647 38. Taylor, S.H., Franks, P.J., Hulme, S.P., Spriggs, E., Christin, P.A., Edwards, E.J.,  
648 Woodward, F.I. & Osborne, C.P. (2012). Photosynthetic pathway and ecological  
649 adaptation explain stomatal trait diversity amongst grasses. *New Phytol.*, 193,  
650 387-396.  
651
- 652 39. Taylor, S.H., Ripley, B.S., Martin, T., De-Wet, L.-A., Woodward, F.I. & Osborne,  
653 C.P. (2014). Physiological advantages of C<sub>4</sub> grasses in the field: a comparative  
654 experiment demonstrating the importance of drought. *Glob. Change Biol.*, 20,  
655 1922-2003.  
656
- 657 40. Tezara, W., Mitchell, V.J., Driscoll, S.D. & Lawlor, D.W. (1999). Water stress inhibits  
658 plant photosynthesis by decreasing coupling factor and ATP. *Nature*, 401, 914-917.  
659
- 660 41. Tissue, D.T., Griffin., K.L., Thomas, R.B. & Strain, B.R. (1995). Effects of low and  
661 elevated CO<sub>2</sub> on C<sub>3</sub> and C<sub>4</sub> annuals. II. Photosynthesis and leaf biochemistry.  
662 *Oecologia*, 101, 21-28.  
663
- 664 42. Vico, G. & Porporato, A. (2008). Modelling C<sub>3</sub> and C<sub>4</sub> photosynthesis under  
665 water-stressed conditions. *Plant and Soil*, 313, 187-203.  
666
- 667 43. Vogan, P.J. & Sage R.F. (2012). Effects of low atmospheric CO<sub>2</sub> and elevated  
668 temperature during growth on the gas exchange responses of C<sub>3</sub>, C<sub>3</sub>-C<sub>4</sub> intermediate,

- 669 and C<sub>4</sub> species from three evolutionary lineages of C<sub>4</sub> photosynthesis. *Oecologia*,  
670 169, 341-352.
- 671
- 672 44. Way, D.A., Katul, G.G., Manzoni, S. & Vico, G. (2014). Increasing water use  
673 efficiency along the C<sub>3</sub> to C<sub>4</sub> evolutionary pathway: a stomatal optimization  
674 perspective. *J. Exp. Bot.*, 65, 3683-3693.
- 675
- 676 45. Wullschleger, S.D. (1993). Biochemical limitations to carbon assimilation in C<sub>3</sub> plants  
677 - A retrospective analysis of the A/C<sub>i</sub> curves from 109 species. *J. Exp. Bot.*, 44,  
678 907-920.
- 679
- 680 46. Ye Z., Suggett, D.J., Robakowski, P., Kang, H. (2013). A mechanistic model for the  
681 photosynthesis-light response based on the photosynthetic electron transport of  
682 photosystem II in C<sub>3</sub> and C<sub>4</sub> species. *New Phytol.*, 199: 110–120.
- 683
- 684
- 685

686 Figure Legends

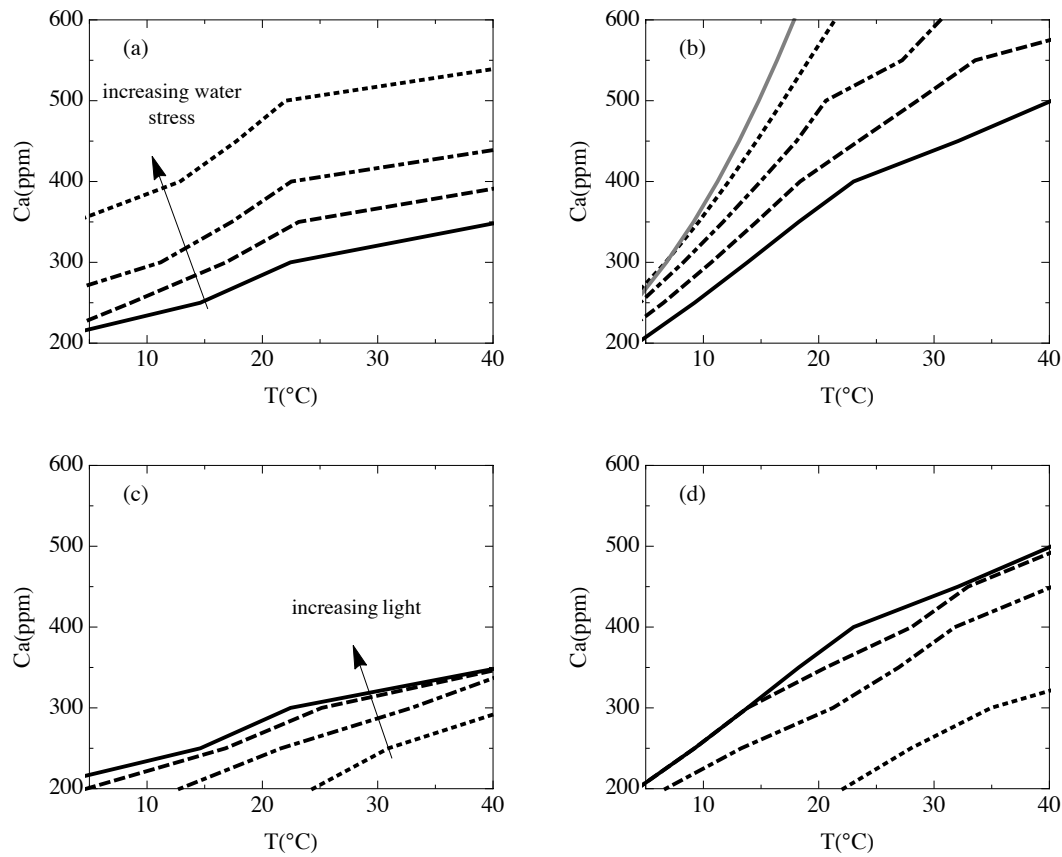

687

688 Fig. 1. (a) Crossover temperatures of photosynthesis for  $C_3$  and  $C_4$  with the change of

689  $CO_2$  concentration under different water conditions. Light intensity was  $1400 \mu mol$

690  $photons\ m^{-2}\ s^{-1}$  and  $J_{max}/V_{cmax}=2.1$  for  $C_3$  and  $C_4$ ; (b) same as (a) except  $J_{max}/V_{cmax}=2.1$

691 for  $C_3$  and  $J_{max}/V_{cmax}=4.5$  for  $C_4$ . Solid black line:  $VPD=0.15\ kPa$ ,  $\Psi_S=0\ MPa$ ; dashed

692 black line:  $VPD=1\ kPa$ ,  $\Psi_S=-0.5\ MPa$ ; dot-dashed black line:  $VPD=2\ kPa$ ,  $\Psi_S=-1\ MPa$ ;

693 dotted black line:  $VPD=3\ kPa$ ,  $\Psi_S=-1.5\ MPa$ ; solid gray line:  $VPD=4\ kPa$ ,  $\Psi_S=-2\ MPa$ . (c)

694 Crossover temperatures with the change of  $CO_2$  concentration under different light

695 intensities under saturated water condition ( $VPD=0.15\ kPa$ ,  $\Psi_S=0\ MPa$ ).  $J_{max}/V_{cmax}=2.1$

696 for  $C_3$  and  $C_4$ , (d) same as (c) except  $J_{max}/V_{cmax}=2.1$  for  $C_3$  and  $J_{max}/V_{cmax}=4.5$  for  $C_4$ .

697 Solid black line: 1400  $\mu\text{mol photons m}^{-2}\text{s}^{-1}$ ; dashed black line: 1000  $\mu\text{mol photons m}^{-2}\text{s}^{-1}$ ;

698 dot-dashed black line: 600  $\mu\text{mol photons m}^{-2}\text{s}^{-1}$ ; dotted black line: 200  $\mu\text{mol photons}$

699  $\text{m}^{-2}\text{s}^{-1}$ .

700

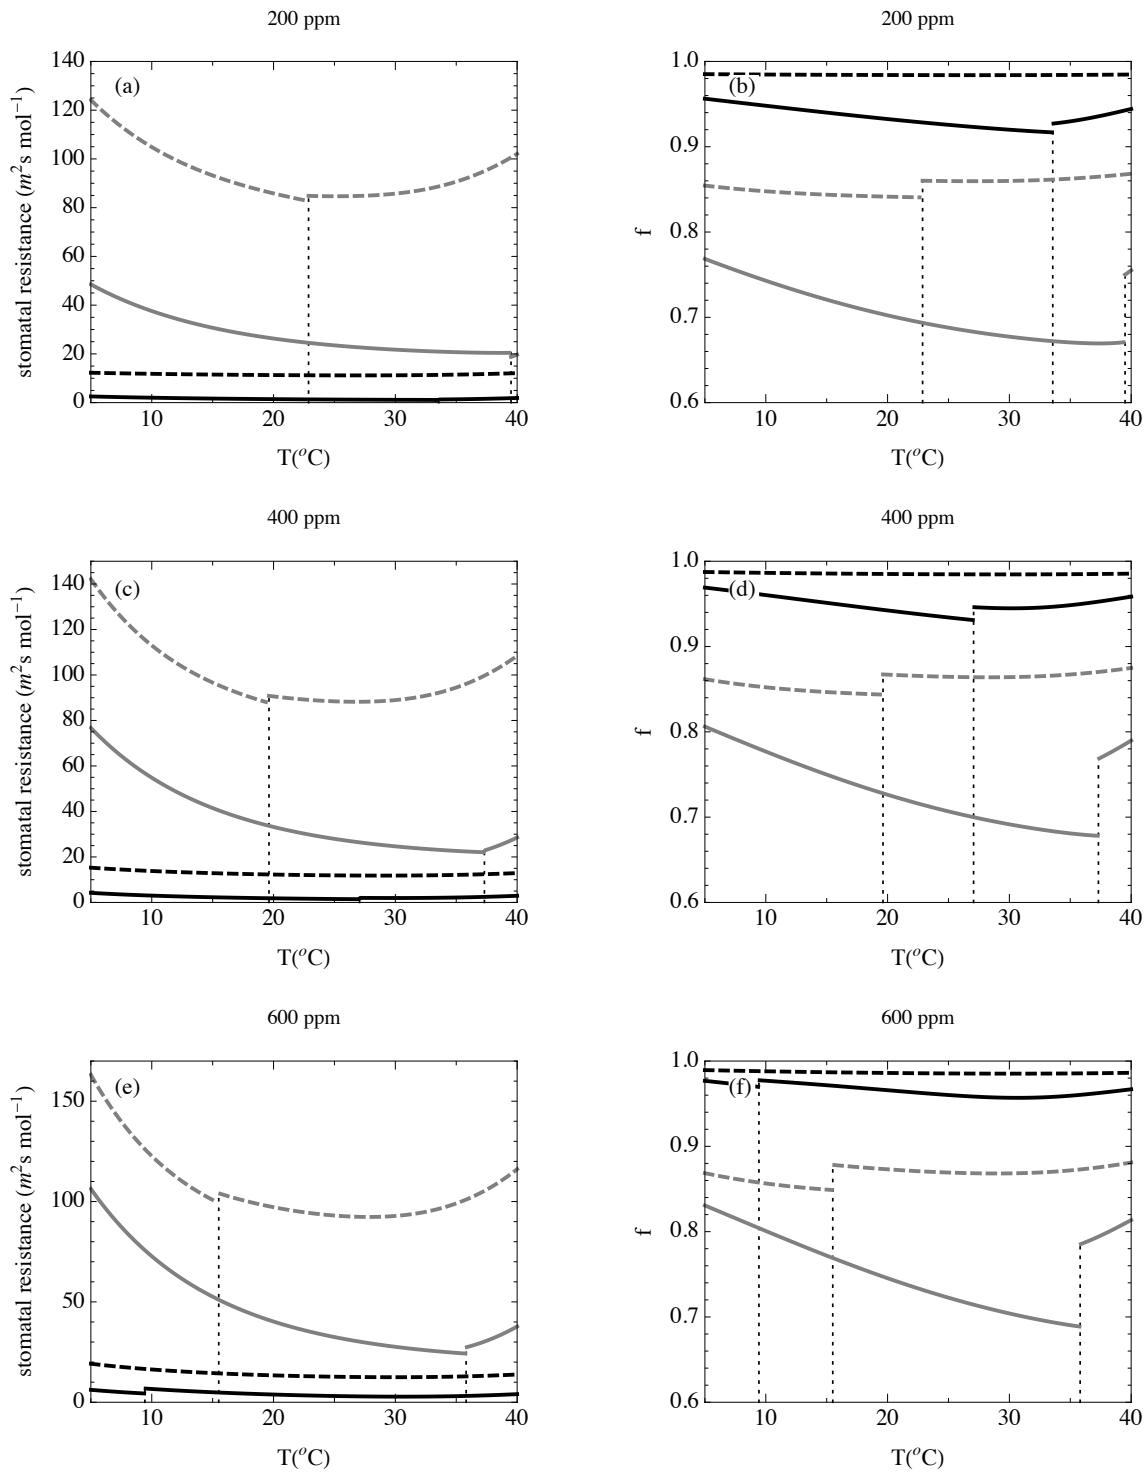

701  
 702 Fig. 2. Stomatal resistance ( $r_s$ ) and leaf allocation ( $f$ ) as a function of temperature, with  
 703  $J_{max}/V_{cmax}=2.1$  for both  $C_3$  and  $C_4$  with saturated light under different  $CO_2$  (200 ppm, 400

704 ppm and 600 ppm) and different water conditions. Solid black line: C<sub>3</sub> with  
705 VPD=0.15kPa,  $\Psi_S=0$  MPa; dashed black line: C<sub>4</sub> with VPD=0.15kPa,  $\Psi_S=0$ ; solid grey  
706 line: C<sub>3</sub> with VPD=4 kPa,  $\Psi_S=-2$  MPa; dashed grey line: C<sub>4</sub> with VPD=4 kPa,  $\Psi_S=-2$  MPa.  
707 Vertical lines indicate transition from RuBP carboxylation limited condition to RuBP  
708 regeneration limited condition for C<sub>3</sub>; for C<sub>4</sub>, all the transition temperatures < 5 °C.  
709



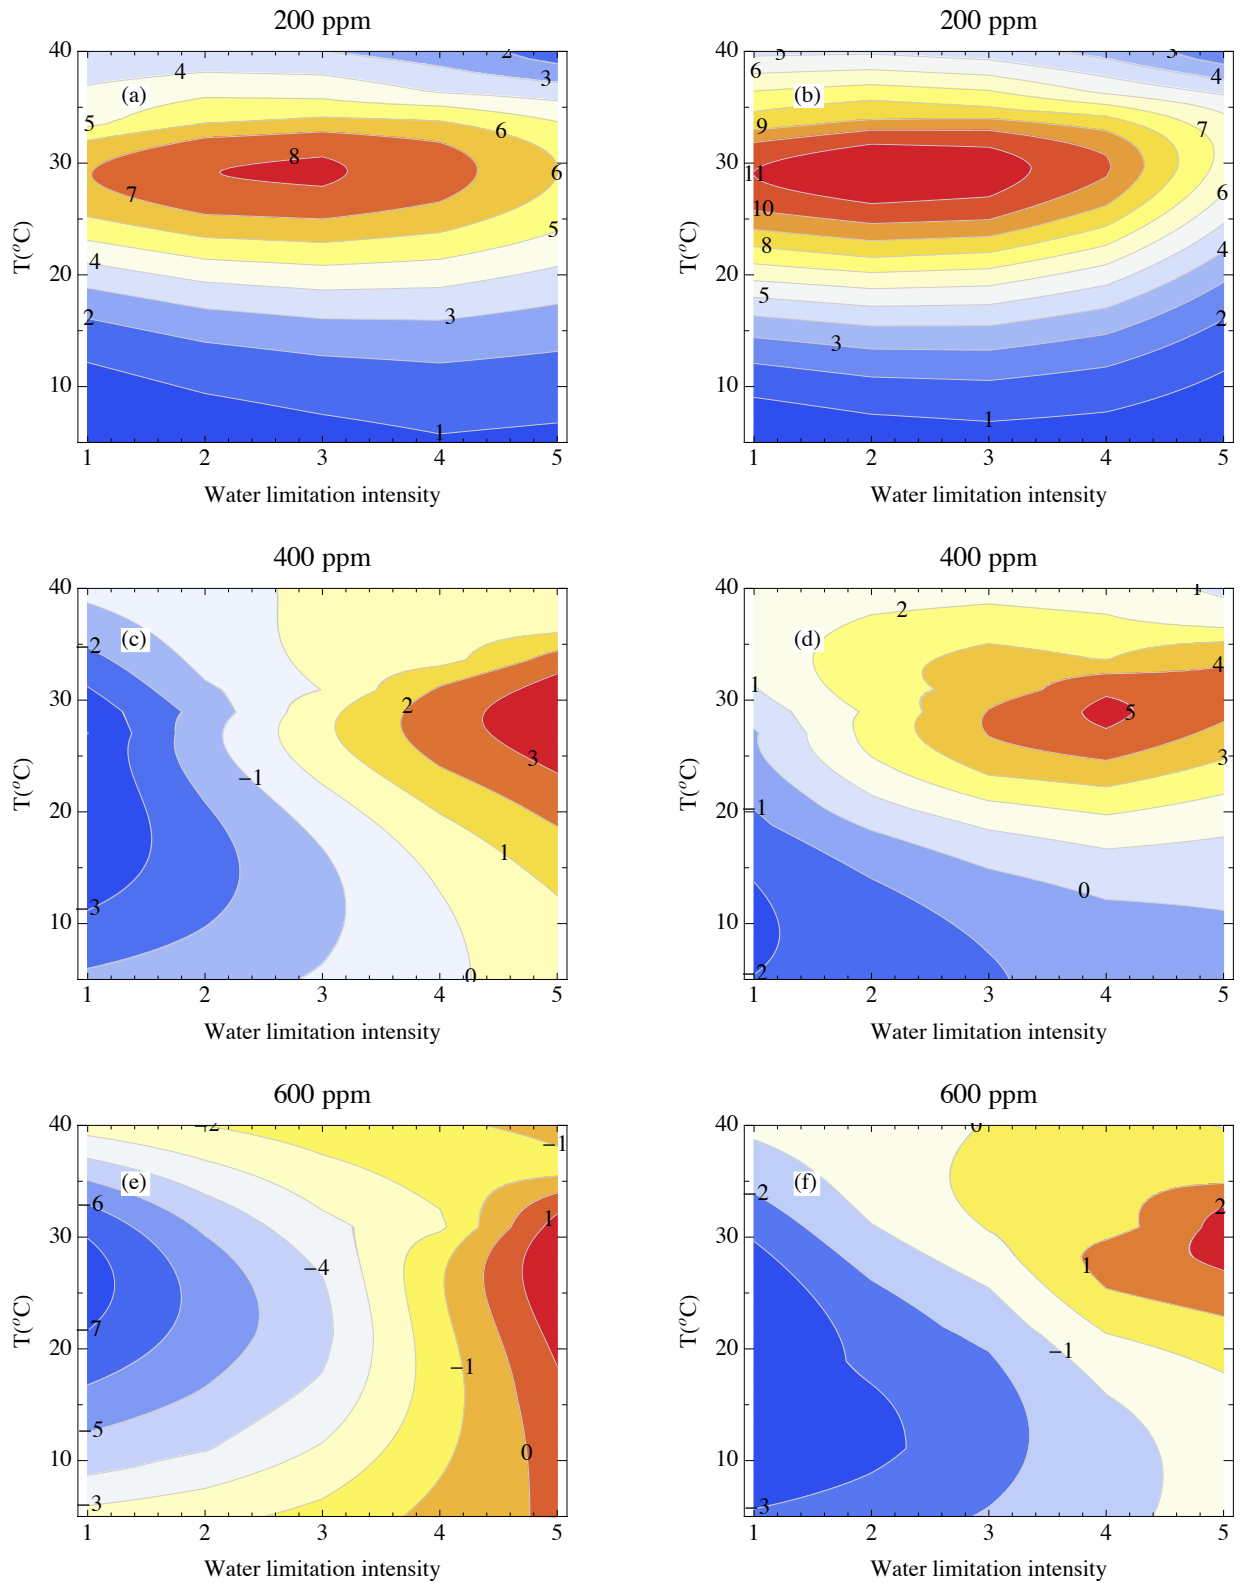

710

711 Fig. 3. Contour plot of modeled assimilation difference between C<sub>4</sub> and C<sub>3</sub>

712 ( $A_n(C_4) - A_n(C_3)$ ) with  $J_{max}/V_{cmax} = 2.1$  for C<sub>3</sub> and C<sub>4</sub> under various CO<sub>2</sub> (200 ppm, 400 ppm

713 and 600 ppm) and saturated light intensity ( $1400 \mu\text{mol photons m}^{-2}\text{s}^{-1}$ ), various water  
714 conditions (a, c, e) and with  $J_{\text{max}}/V_{\text{cmax}}=2.1$  for  $C_3$  and  $J_{\text{max}}/V_{\text{cmax}}=4.5$  for  $C_4$  (b, d, f).  
715 Water limitation intensity 1, 2, 3, 4, 5 refers to  $\text{VPD}=0.15\text{kPa}$ ,  $\Psi_{\text{S}}=0 \text{ MPa}$ ;  $1.5 \text{ kPa}$ ,  
716  $-0.5\text{MPa}$ ;  $2\text{kPa}$ ,  $-1 \text{ MPa}$ ;  $3\text{kPa}$ ,  $-1.5 \text{ MPa}$ ;  $4\text{kPa}$ ,  $-2 \text{ MPa}$ .  
717

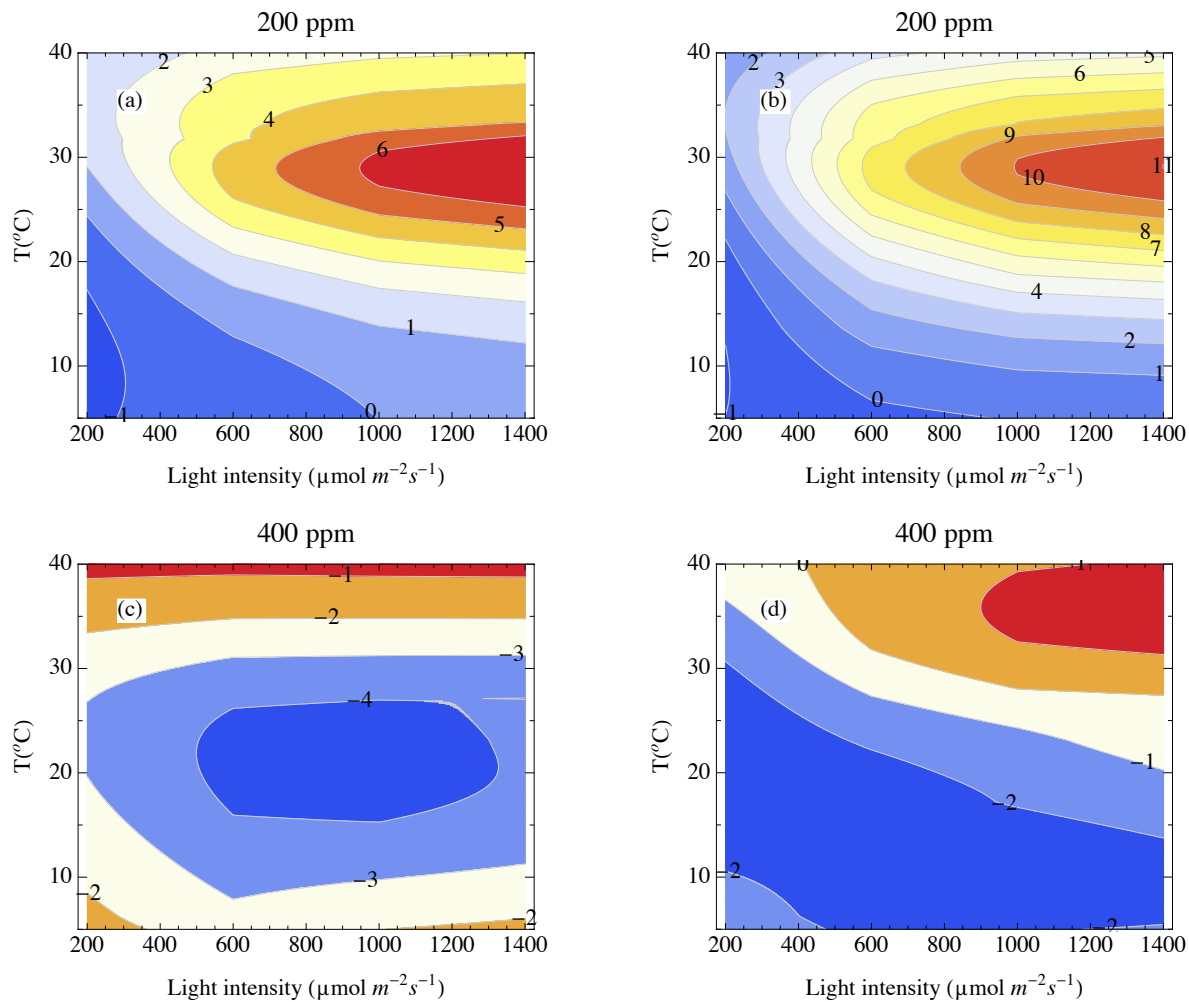

718  
719 Fig. 4. Contour plot of modeled assimilation difference between  $C_4$  and  $C_3$   
720 ( $A_n(C_4)-A_n(C_3)$ ) with  $J_{\text{max}}/V_{\text{cmax}}=2.1$  for  $C_3$  and  $C_4$  under various  $\text{CO}_2$  (200 ppm, 400 ppm)  
721 and different light intensities (from 200 to  $1400 \mu\text{mol photons m}^{-2}\text{s}^{-1}$ ) with saturated water

722 condition (VPD=0.15kPa,  $\Psi_S=0$  MPa) (a, c) and with  $J_{\max}/V_{\text{cmax}}=2.1$  for  $C_3$  and

723  $J_{\max}/V_{\text{cmax}}=4.5$  for  $C_4$  (b, d).

724

725

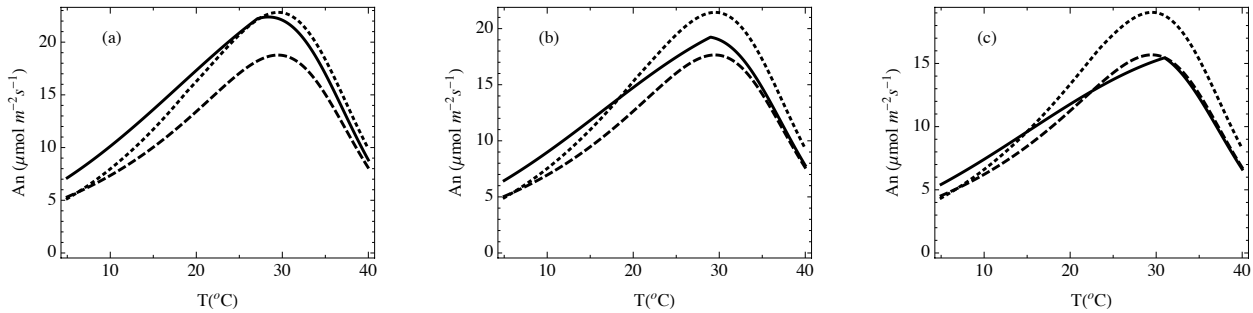

726

727 Fig. 5. Assimilation rates of  $C_3$  with  $J_{\max}/V_{\text{cmax}}=2.1$  (solid black line),  $C_4$  with

728  $J_{\max}/V_{\text{cmax}}=2.1$  (dashed black line) and  $C_4$  with  $J_{\max}/V_{\text{cmax}}=4.5$  (dotted black line) under

729 light intensity of  $1400 \mu\text{mol photons m}^{-2}\text{s}^{-1}$ ,  $\text{CO}_2$  of 400 ppm and different water limited

730 conditions. (a) saturated soils; (b) VPD=1kPa and  $\Psi_S=-0.5$  MPa; (c) VPD=2kPa and

731  $\Psi_S=-1$  MPa.

732
